# Supplementary material for: An ensemble variable selection method for vibrational spectroscopic data analysis
Source: Royal Society of Chemistry journal article supplement (doi:10.1039/c8ra08754g), 2019-01-01
Supplement: c8ra08754g1.pdf [file c8ra08754g1.pdf]

**Table S1.** Validation set accuracy ( $a_{ave} \pm a_{std}$  %) ( $a_{ave} \pm a_{std}$ : average accuracy rate  $\pm$  standard error over 20 repeats). The data sets was preprocessed by normalization before modeling..

| Data set          | Type  | PLS-DA         | BSS             | GA-PLS-DA       | s-PLS-DA                         | EBSS                              |
|-------------------|-------|----------------|-----------------|-----------------|----------------------------------|-----------------------------------|
| <i>Olive oil</i>  | FTIR  | 91.3 $\pm$ 3.2 | 92.6 $\pm$ 2.8  | 91.1 $\pm$ 3.0  | 95.1 $\pm$ 3.1                   | <b>96.6 <math>\pm</math> 2.9</b>  |
| <i>Red wine</i>   | FTIR  | 57.1 $\pm$ 8.9 | 58.9 $\pm$ 11.1 | 57.9 $\pm$ 11.5 | 66.8 $\pm$ 9.8                   | <b>68.6 <math>\pm</math> 11.4</b> |
| <i>NIR Tablet</i> | NIR   | 84.8 $\pm$ 2.2 | 84.0 $\pm$ 3.8  | 86.7 $\pm$ 4.0  | <b>88.3 <math>\pm</math> 2.9</b> | 87.5 $\pm$ 4.0                    |
| <i>Raman</i>      | Raman | 83.0 $\pm$ 4.7 | 75.4 $\pm$ 6.8  | 75.3 $\pm$ 6.9  | 78.8 $\pm$ 4.9                   | <b>85.7 <math>\pm</math> 5.8</b>  |
| <i>Tablet</i>     |       |                |                 |                 |                                  |                                   |

**Table S2.** The number of selected variables ( $n_{ave} \pm n_{std}$ ) ( $n_{ave} \pm n_{std}$ : average number of selected variable  $\pm$  standard error over 20 repeats). The data sets was preprocessed by normalization before modeling.

| Data set            | Type  | PLS-DA | BSS         | GA-PLS-DA   | s-PLS-DA    | EBSS      |
|---------------------|-------|--------|-------------|-------------|-------------|-----------|
| <i>Olive oil</i>    | FTIR  | 570    | 10 $\pm$ 4  | 33 $\pm$ 8  | 65 $\pm$ 21 | <b>9</b>  |
| <i>Red wine</i>     | FTIR  | 842    | 13 $\pm$ 12 | 32 $\pm$ 15 | 52 $\pm$ 30 | <b>23</b> |
| <i>NIR tablet</i>   | NIR   | 404    | 28 $\pm$ 30 | 43 $\pm$ 6  | 59 $\pm$ 18 | <b>27</b> |
| <i>Raman tablet</i> | Raman | 3041   | 36 $\pm$ 20 | 55 $\pm$ 13 | 76 $\pm$ 19 | <b>30</b> |

**Table S3.**

Validation set accuracy ( $a_{ave} \pm a_{std}$  %) ( $a_{ave} \pm a_{std}$ : average accuracy rate  $\pm$  standard error over 20 repeats). The data sets was preprocessed by standard normal variate transformation (SNV) before modeling.

| Data set          | Type  | PLS-DA      | BSS         | GA-PLS-DA   | s-PLS-DA    | EBSS               |
|-------------------|-------|-------------|-------------|-------------|-------------|--------------------|
| <i>Olive oil</i>  | FTIR  | 94.0 ± 2.0  | 90.8 ± 3.3  | 92.1 ± 4.4  | 94.2 ± 2.2  | <b>94.7 ± 3.0</b>  |
| <i>Red wine</i>   | FTIR  | 58.2 ± 10.4 | 58.2 ± 13.9 | 58.2 ± 11.0 | 67.5 ± 10.5 | <b>60.4 ± 10.5</b> |
| <i>NIR Tablet</i> | NIR   | 84.7 ± 3.3  | 84.2 ± 3.3  | 82.2 ± 2.8  | 86.2 ± 3.1  | <b>89.0 ± 2.6</b>  |
| <i>Raman</i>      | Raman | 79.9 ± 4.2  | 74.2 ± 7.2  | 74.5 ± 7.3  | 72.6 ± 6.1  | <b>87.2 ± 6.2</b>  |
| <i>Tablet</i>     |       |             |             |             |             |                    |

**Table S4.** The number of selected variables ( $n_{ave} \pm n_{std}$ ) ( $n_{ave} \pm n_{std}$ : average number of selected variable ± standard error over 20 repeats). The data sets was preprocessed by SNV before modeling.

| Data set            | Type  | PLS-DA | BSS     | GA-PLS-DA | s-PLS-DA | EBSS      |
|---------------------|-------|--------|---------|-----------|----------|-----------|
| <i>Olive oil</i>    | FTIR  | 570    | 9 ± 3   | 37 ± 11   | 65 ± 23  | <b>11</b> |
| <i>Red wine</i>     | FTIR  | 842    | 11 ± 5  | 36 ± 12   | 57 ± 22  | <b>11</b> |
| <i>NIR tablet</i>   | NIR   | 404    | 15 ± 5  | 47 ± 4    | 64 ± 15  | <b>27</b> |
| <i>Raman tablet</i> | Raman | 3041   | 34 ± 16 | 62 ± 8    | 64 ± 19  | <b>29</b> |

**Table S5.**

Validation set accuracy ( $a_{ave} \pm a_{std}$  %) ( $a_{ave} \pm a_{std}$ : average accuracy rate ± standard error over 20 repeats). The data sets was preprocessed by 1<sup>st</sup> derivative before modeling.

| Data set          | Type | PLS-DA      | BSS         | GA-PLS-DA   | s-PLS-DA   | EBSS               |
|-------------------|------|-------------|-------------|-------------|------------|--------------------|
| <i>Olive oil</i>  | FTIR | 94.2 ± 2.6  | 95.5 ± 3.8  | 94.6 ± 2.9  | 95.9 ± 2.5 | <b>95.6 ± 4.1</b>  |
| <i>Red wine</i>   | FTIR | 50.7 ± 12.9 | 53.2 ± 15.6 | 51.1 ± 14.9 | 50.0 ± 12  | <b>61.4 ± 12.9</b> |
| <i>NIR Tablet</i> | NIR  | 86.8 ± 2.8  | 85.4 ± 3.0  | 85.5 ± 3.3  | 84.1 ± 2.6 | <b>85.6 ± 3.7</b>  |

*Raman*            Raman     $80.8 \pm 5.2$      $77.4 \pm 7.2$      $74.9 \pm 5.6$              $59.3 \pm 6.3$              $51.7 \pm 7.5$

*Tablet*

---

**Table S6.** The number of selected variables ( $n_{ave} \pm n_{std}$ ) ( $n_{ave} \pm n_{std}$ : average number of selected variable  $\pm$  standard error over 20 repeats). The data sets was preprocessed by 1<sup>st</sup> derivative before modeling.

| Data set            | Type  | PLS-DA | BSS         | GA-PLS-DA   | s-PLS-DA    | EBSS      |
|---------------------|-------|--------|-------------|-------------|-------------|-----------|
| <i>Olive oil</i>    | FTIR  | 570    | $89 \pm 65$ | $59 \pm 10$ | $45 \pm 22$ | <b>24</b> |
| <i>Red wine</i>     | FTIR  | 842    | $49 \pm 28$ | $32 \pm 11$ | $47 \pm 30$ | <b>9</b>  |
| <i>NIR tablet</i>   | NIR   | 404    | $39 \pm 17$ | $42 \pm 8$  | $56 \pm 25$ | <b>25</b> |
| <i>Raman tablet</i> | Raman | 3041   | $89 \pm 65$ | $59 \pm 10$ | $45 \pm 22$ | <b>44</b> |
